# Supplementary material for: A novel wet-scrubbing process using Fe(vi) for simultaneous removal of SO2 and NO
Source: Royal Society of Chemistry journal article supplement (doi:10.1039/c0em00647e), 2011-01-01

## Supporting Information

### **A novel wet-scrubbing process using Fe(VI) for simultaneous removal of SO<sub>2</sub> and NO**

Dehua Xia <sup>a</sup>, Chun He <sup>a,b\*</sup>, Lingfei Zhu <sup>a</sup>, Yanling Huang <sup>a</sup>, Hanying Dong <sup>a,b</sup>, Minhua  
Su <sup>a</sup>, Mudar Abou Asi <sup>a</sup>, Di Bian <sup>a</sup>,

<sup>a</sup> *School of Environmental Science and Engineering, Sun Yat-sen University,  
Guangzhou, 510275, China*

<sup>b</sup> *Guangdong Provincial Key Laboratory of Environmental Pollution Control and  
Remediation Technology, Guangzhou, 510275, China*

**(3 Pages including supplementary 2 Figures)**

**Journal: Journal of Environmental Monitoring**

---

\*Corresponding author at: School of Environmental Science and Engineering, Sun Yat-sen University, Guangzhou, 510275, China. Tel.: +86 20 80958871; Fax: +86 20 39332690. Email address: hechun@mail.sysu.edu.cn (C. He).

Fig. S1. Ion chromatography graph of products in aqueous solution for NO oxidation by Fe(VI).

Fig. S2. Ion chromatography graph of products in aqueous solution for SO<sub>2</sub> oxidation by Fe(VI).

Fig. S1

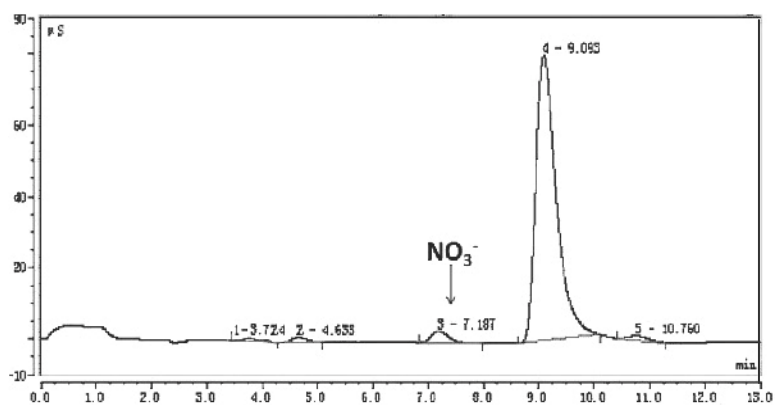

Fig. S2

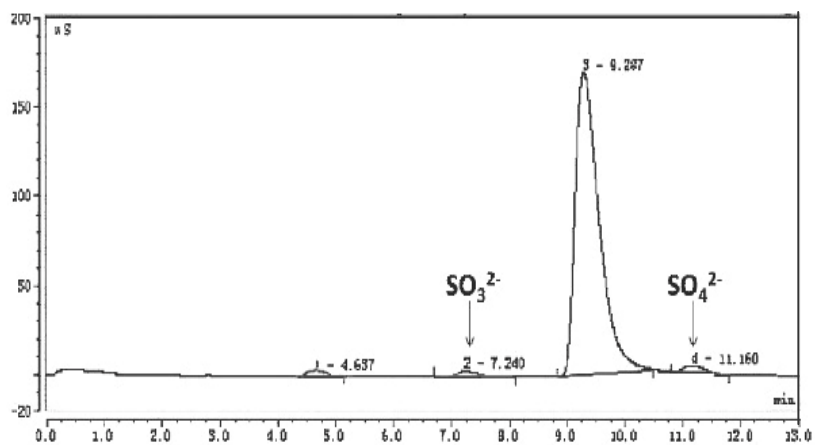

Supplement: c0em00647e.pdf [file c0em00647e.pdf]
